# Supplementary material for: Microbiota and adipocyte mitochondrial damage in type 2 diabetes are linked by Mmp12+ macrophages
Source: PubMed Central journal article supplement — J Exp Med. 2022 Jun 3;219(7):e20220017. doi: 10.1084/jem.20220017 (PMC9170383; doi:10.1084/jem.20220017), 2022-06-03
Supplement: JEM_20220017_SourceDataFS1.pdf [file JEM_20220017_SourceDataFS1.pdf]

Source Data to "Western diet-associated gut microbiota and adipocyte mitochondrial damage in diabetes are linked by Mmp12-expressing macrophages" by Zhipeng Li, Andrey Morgun, Natalia Shulzhenko, et al, 2022

Primary Antibodies:

Akt (pan) (C67E7) Rabbit mAb (Cell Signaling cat# #4691)

PTEN (D4.3) XP Rabbit mAb (Cell Signaling cat# 9188S)

Phospho-p44/42 MAPK (Erk1/2) (Thr202/Tyr204) (D13.14.4E) XP Rabbit mAb (Cell Signaling cat# 4370)

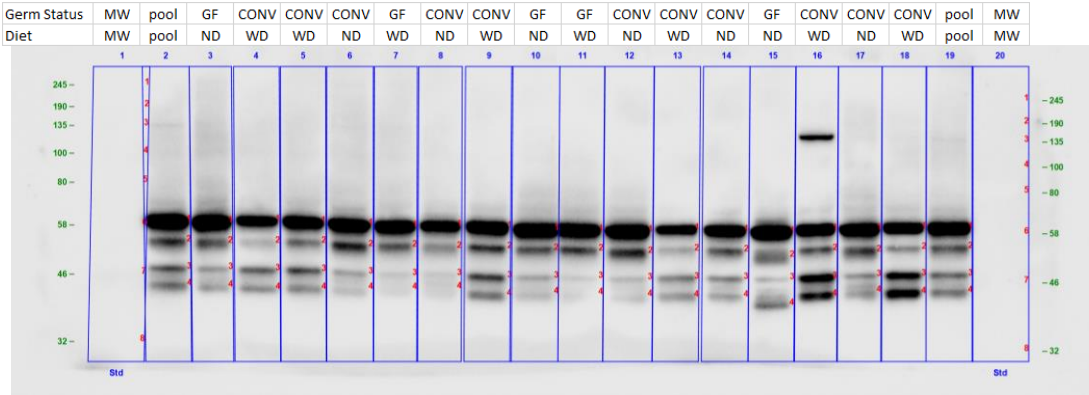

AKT (60.5 kDa)  
 PTEN (54.1 kDa)  
 phos-Erk1/2 (44.8, 48.2 kDa)

Western blot A of adipose tissue.

MW = molecular weight ladder (kDa); pool = pool of all adipose tissue samples; CONV = conventionalized; GF = germ-free; ND = normal diet; WD = western diet.

The bottom section of the membrane was cut off and probed solely for cofilin (intended to be a loading control; Cell Signaling cat# 5175S).

Primary Antibodies:

Akt (pan) (C67E7) Rabbit mAb (Cell Signaling cat# #4691)

PTEN (D4.3) XP Rabbit mAb (Cell Signaling cat# 9188S)

Phospho-p44/42 MAPK (Erk1/2) (D13.14.4E) XP Rabbit mAb (Cell Signaling cat# 4370)

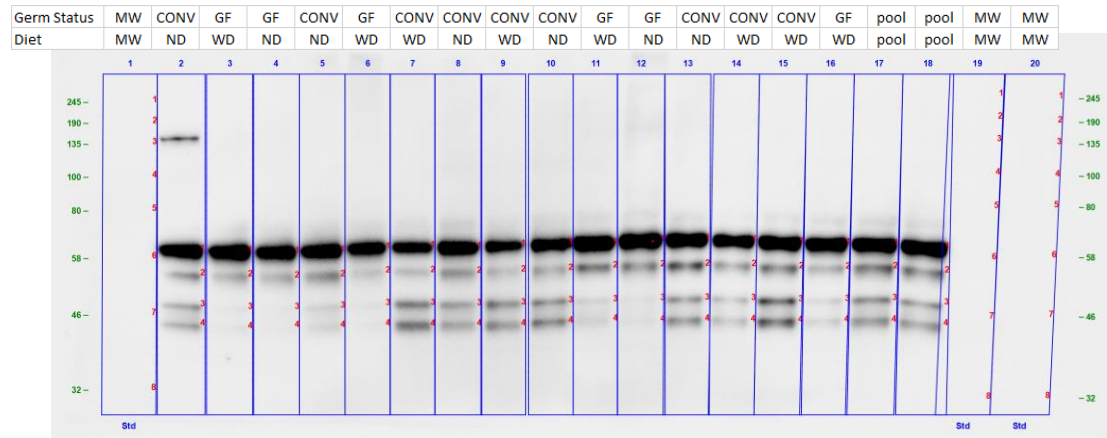

AKT (60.5 kDa)  
 PTEN (54.1 kDa)  
 phos-Erk1/2 (44.8, 48.2 kDa)

Western blot B of adipose tissue.

MW = molecular weight ladder (kDa); pool = pool of all adipose tissue samples; CONV = conventionalized; GF = germ-free; ND = normal diet; WD = western diet.

The bottom section of the membrane was cut off and probed solely for cofilin (intended to be a loading control; Cell Signaling cat# 5175S).

Primary Antibodies:

Phospho-Akt (Ser473) (D9E) XP Rabbit mAb (Cell Signaling cat# 4060)

Phospho-PTEN (Ser380/Thr382/383) Rabbit pAb (Cell Signaling cat# 9554)

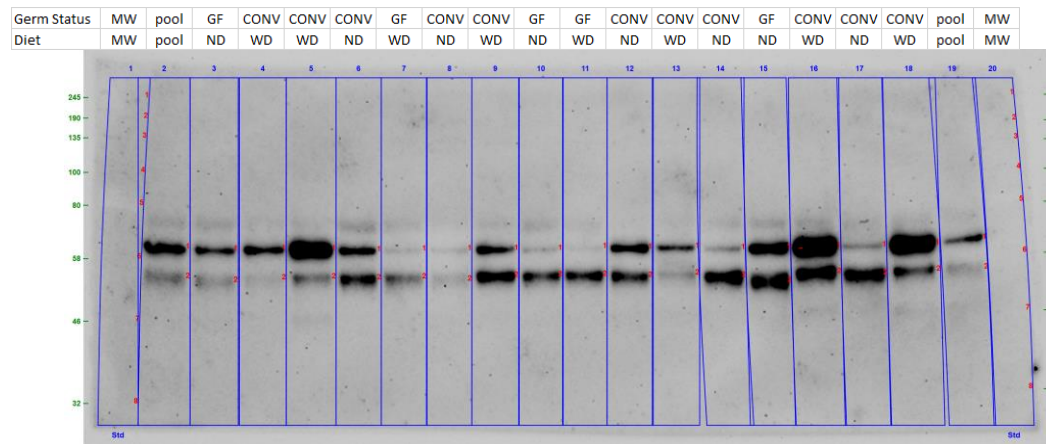

phos-AKT (61.4 kDa)  
phos-PTEN (54.1 kDa)

Western blot O of adipose tissue.

MW = molecular weight ladder (kDa); pool = pool of all adipose tissue samples; CONV = conventionalized; GF = germ-free; ND = normal diet; WD = western diet.

The bottom section of the membrane was cut off and probed solely for cofilin (intended to be a loading control; Cell Signaling cat# 5175S).

Primary Antibodies:

GSK-3 $\beta$  (D5C5Z) XP Rabbit mAb (Cell Signaling cat# 12456)

p38 MAPK (D13E1) XP Rabbit mAb (Cell Signaling cat# 8690S)

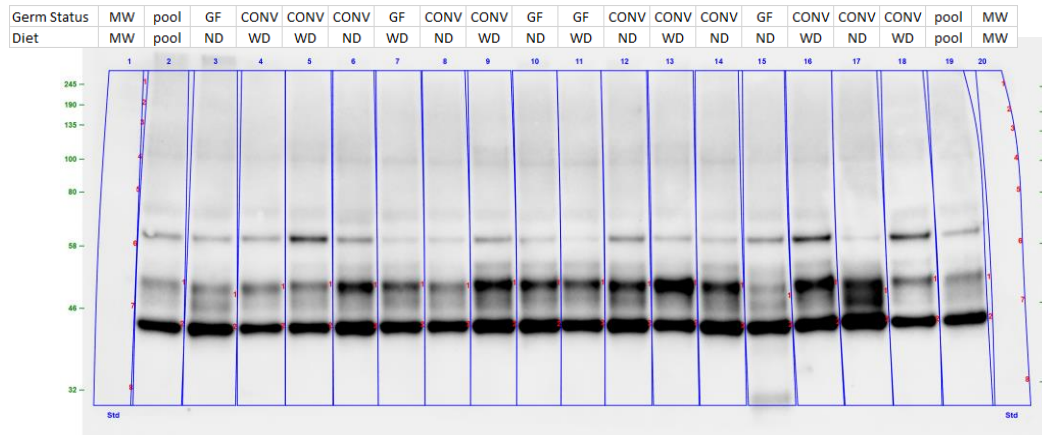

carryover: phos-AKT (61.4 kDa)  
carryover: phos-PTEN (54.1 kDa)

GSK3B (50.5 kDa)  
p38 (43.7 kDa)

Western blot V of adipose tissue.

MW = molecular weight ladder (kDa); pool = pool of all adipose tissue samples; CONV = conventionalized; GF = germ-free; ND = normal diet; WD = western diet.

The bottom section of the membrane was cut off and probed solely for cofilin (intended to be a loading control; Cell Signaling cat# 5175S).

This western blot was subsequent to western blot O, and it used the same membrane (it was not stripped first).

Primary Antibodies:

GSK-3 $\beta$  (D5C5Z) XP Rabbit mAb (Cell Signaling cat# 12456)

p38 MAPK (D13E1) XP Rabbit mAb (Cell Signaling cat# 8690S)

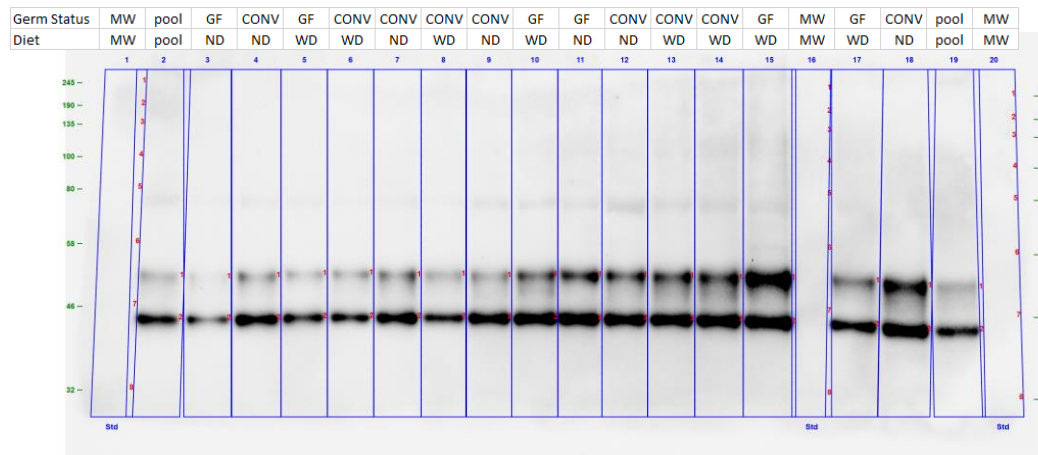

GSK3B (50.5 kDa)  
p38 (43.7 kDa)

Western blot P of adipose tissue.

MW = molecular weight ladder (kDa); pool = pool of all adipose tissue samples; CONV = conventionalized; GF = germ-free; ND = normal diet; WD = western diet.

The bottom section of the membrane was cut off and probed solely for cofilin (intended to be a loading control; Cell Signaling cat# 5175S).

Primary Antibodies:

Phospho-Akt (Ser473) (D9E) XP Rabbit mAb (Cell Signaling cat# 4060)

Phospho-PTEN (Ser380/Thr382/383) Rabbit pAb (Cell Signaling cat# 9554)

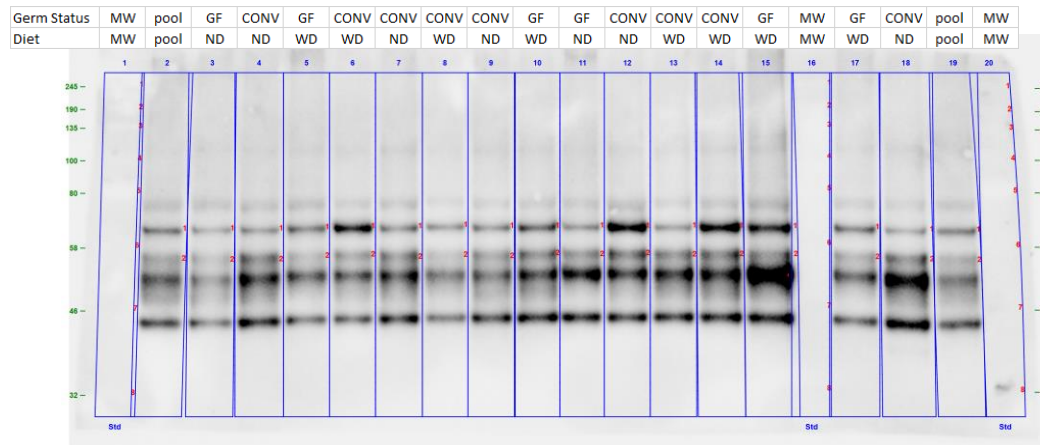

phos-AKT (61.4 kDa)  
 phos-PTEN (54.1 kDa)  
 carryover: GSK3B (50.5 kDa)  
 carryover: p38 (43.7 kDa)

Western blot W of adipose tissue.

MW = molecular weight ladder (kDa); pool = pool of all adipose tissue samples; CONV = conventionalized; GF = germ-free; ND = normal diet; WD = western diet.

The bottom section of the membrane was cut off and probed solely for cofilin (intended to be a loading control; Cell Signaling cat# 5175S).

This western blot was subsequent to western blot P, and it used the same membrane (it was not stripped first).

## Primary Antibodies:

Phospho-p38 MAPK (Thr180/Tyr182) (D3F9) XP Rabbit mAb (Cell Signaling cat# 4511)

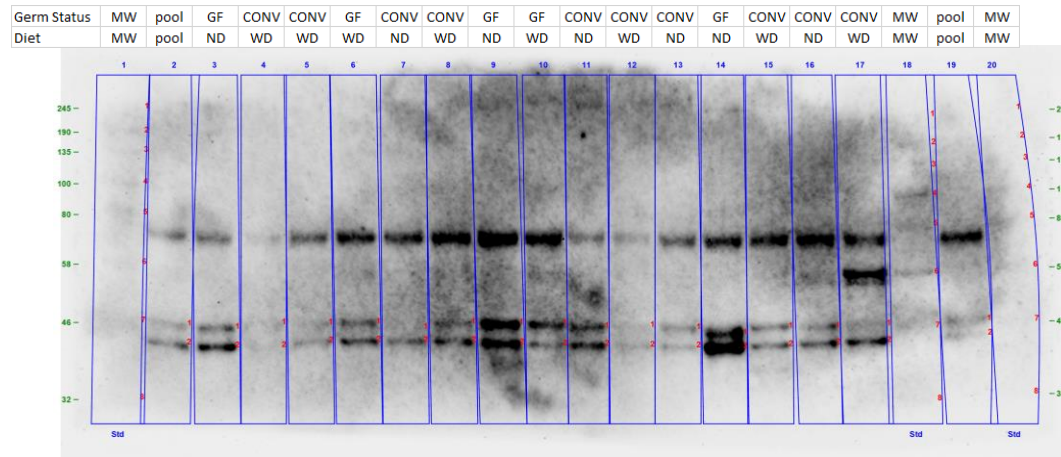

phos-p38 (two bands at ~43.8 kDa)

Western blot L of adipose tissue.

MW = molecular weight ladder (kDa); pool = pool of all adipose tissue samples; CONV = conventionalized; GF = germ-free; ND = normal diet; WD = western diet.

The bottom section of the membrane was cut off and probed solely for cofilin (intended to be a loading control; Cell Signaling cat# 5175S).

## Primary Antibodies:

Phospho-p38 MAPK (Thr180/Tyr182) (D3F9) XP Rabbit mAb (Cell Signaling cat# 4511)

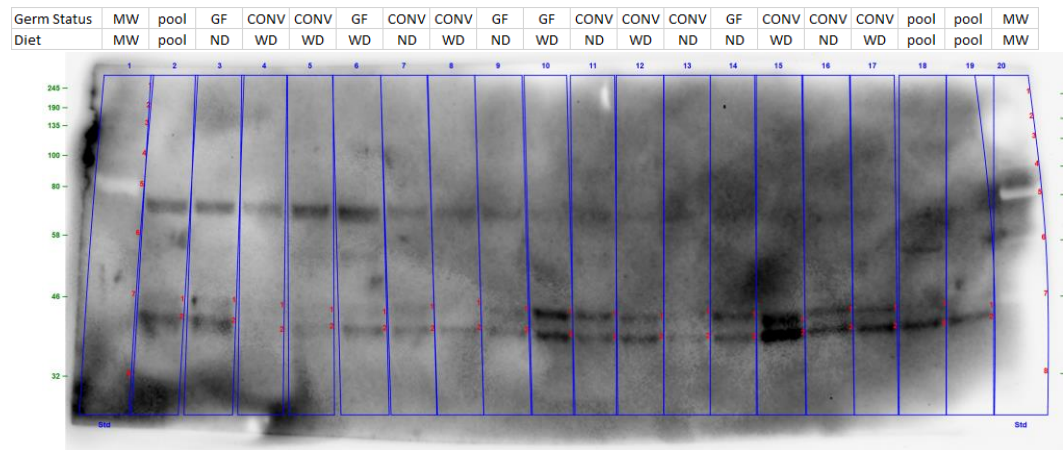

Western blot L2 of adipose tissue.

MW = molecular weight ladder (kDa); pool = pool of all adipose tissue samples; CONV = conventionalized; GF = germ-free; ND = normal diet; WD = western diet.

The bottom section of the membrane was cut off and probed solely for cofilin (intended to be a loading control; Cell Signaling cat# 5175S).

Western blot L2 had the same sample layout as Western blot L except for lane 18.



## Primary Antibodies:

Phospho-p38 MAPK (Thr180/Tyr182) (D3F9) XP Rabbit mAb (Cell Signaling cat# 4511)

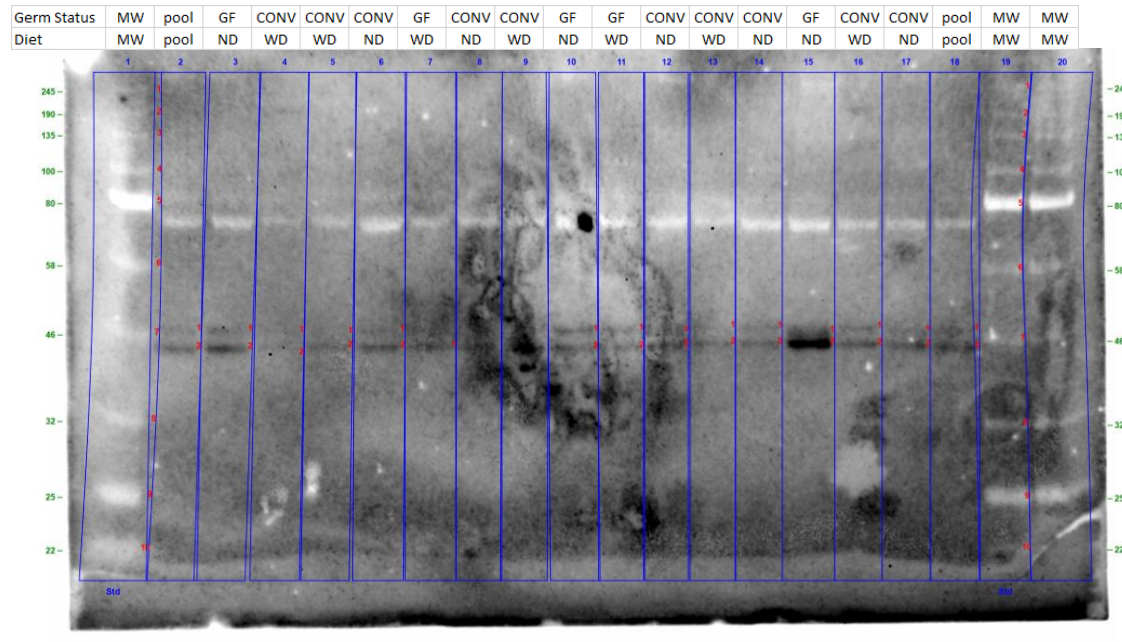

phos-p38 (two bands at ~43.8 kDa)

Western blot X3 of adipose tissue.

MW = molecular weight ladder (kDa); pool = pool of all adipose tissue samples; CONV = conventionalized; GF = germ-free; ND = normal diet; WD = western diet.

Primary Antibodies:

Phospho-p38 MAPK (Thr180/Tyr182) (D3F9) XP Rabbit mAb (Cell Signaling cat# 4511)

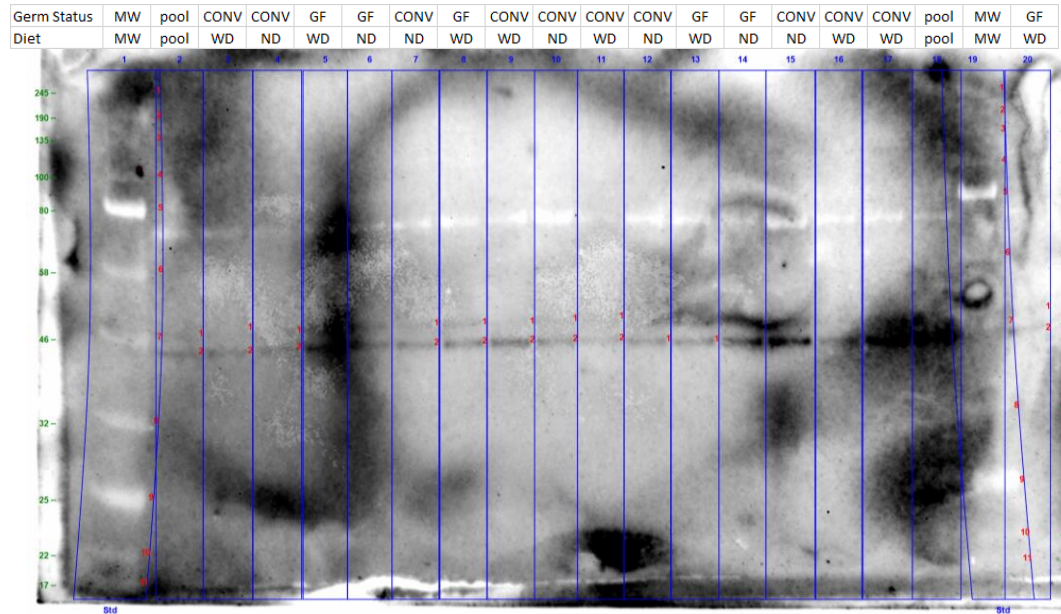

phos-p38 (two bands at ~43.8 kDa)

Western blot Y3 of adipose tissue.

MW = molecular weight ladder (kDa); pool = pool of all adipose tissue samples; CONV = conventionalized; GF = germ-free; ND = normal diet; WD = western diet.
